# Supplementary material for: Identification and functional analysis of long non-coding RNAs in mouse cleavage stage embryonic development based on single cell transcriptome data
Source: PubMed Central journal article supplement (PMC4200203; doi:10.1186/1471-2164-15-845), 2014-10-03
Supplement: 12864_2014_6548_MOESM4_ESM.pdf [file 12864_2014_6548_MOESM4_ESM.pdf]

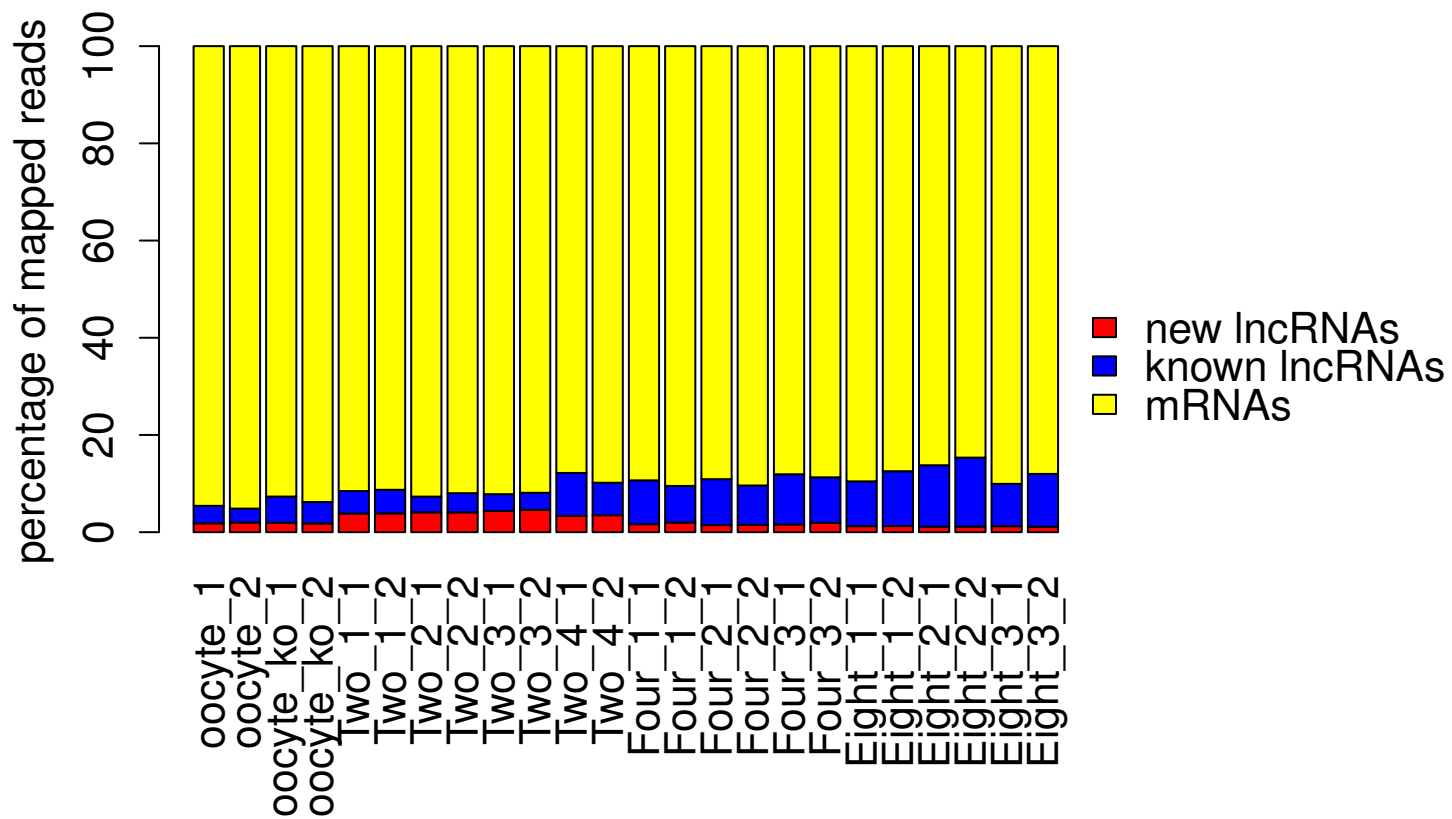

| sample      | Reads mapped in new lncRNAs | Reads mapped in known lncRNAs | Reads mapped in mRNAs |
|-------------|-----------------------------|-------------------------------|-----------------------|
| oocyte_1    | 198985                      | 391383                        | 10311979              |
| oocyte_2    | 94902                       | 136925                        | 4549455               |
| oocyte_ko_1 | 117208                      | 329201                        | 5647694               |
| oocyte_ko_2 | 105084                      | 258240                        | 5496286               |
| Two_1_1     | 180518                      | 217174                        | 4305030               |
| Two_1_2     | 183169                      | 229661                        | 4320867               |
| Two_2_1     | 169509                      | 134365                        | 3851701               |
| Two_2_2     | 202570                      | 196638                        | 4578518               |
| Two_3_1     | 131521                      | 104688                        | 2785874               |
| Two_3_2     | 266908                      | 203313                        | 5336902               |
| Two_4_1     | 124564                      | 329869                        | 3276144               |
| Two_4_2     | 155083                      | 296949                        | 3994165               |
| Four_1_1    | 68801                       | 378675                        | 3749666               |
| Four_1_2    | 148438                      | 564023                        | 6779121               |
| Four_2_1    | 31485                       | 204776                        | 1929961               |
| Four_2_2    | 101435                      | 542651                        | 6063727               |
| Four_3_1    | 38231                       | 250774                        | 2138460               |
| Four_3_2    | 146525                      | 722254                        | 6833691               |
| Eight_1_1   | 84902                       | 630842                        | 6130614               |
| Eight_1_2   | 59456                       | 530574                        | 4116207               |
| Eight_2_1   | 85888                       | 955551                        | 6522671               |
| Eight_2_2   | 74826                       | 927770                        | 5533609               |
| Eight_3_1   | 75753                       | 535057                        | 5537155               |
| Eight_3_2   | 63628                       | 620754                        | 5027652               |
