# Supplementary material for: Identification and functional analysis of long non-coding RNAs in mouse cleavage stage embryonic development based on single cell transcriptome data
Source: PubMed Central journal article supplement (PMC4200203; doi:10.1186/1471-2164-15-845), 2014-10-03

Module Eigengene

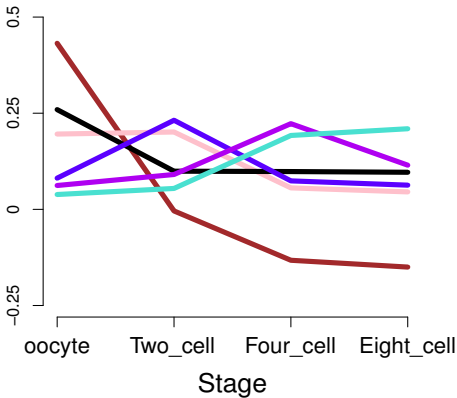

Supplement: 12864_2014_6548_MOESM13_ESM.pdf [file 12864_2014_6548_MOESM13_ESM.pdf]
